# Supplementary material for: Microwave-assisted seed preparation for producing easily phase-transformed anatase to rutile
Source: Royal Society of Chemistry journal article supplement (doi:10.1039/c7ra07385b), 2017-01-01
Supplement: c7ra07385b1.pdf [file c7ra07385b1.pdf]

## Supporting Information

### Microwave-assisted seeds preparation for producing easily phase-transformed anatase to rutile

*Siyang Tang\**, *Yaowen Zhang*, *Shaojun Yuan*, *Hairong Yue*, *Changjun Liu*, *Chun Li*,  
*and Bin Liang*

**STable 1. The variance for different particle size distribution**

| No | STS concentration<br>(g/L) | Mean diameter<br>( $\mu\text{m}$ ) | Heating time<br>(s) | Variance |
|----|----------------------------|------------------------------------|---------------------|----------|
| 1  | 35                         | 1.846                              | 70                  | 0.241    |
| 2  | 40                         | 1.837                              | 80                  | 0.239    |
| 3  | 45                         | 1.857                              | 90                  | 0.241    |
| 4  | 50                         | 1.842                              | 100                 | 0.245    |

The metatitanic acid particle size distribution was carried out under the microwave heating power was 800 w. The HTS concentration was 160 g/L, Fe/TiO<sub>2</sub> was 0.3 and the H<sub>2</sub>SO<sub>4</sub>/TiO<sub>2</sub> was 1.9.

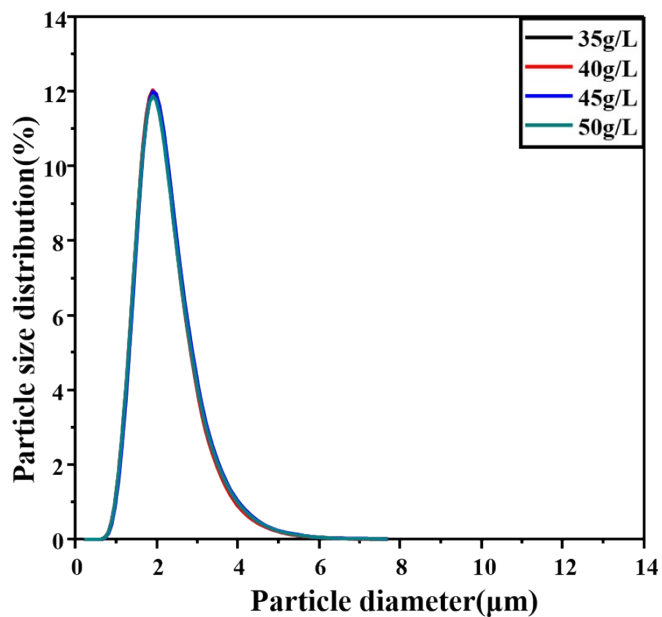

**Figure 1.** The particle size distributions of the metatitanic acid by different seeds preparation concentration.

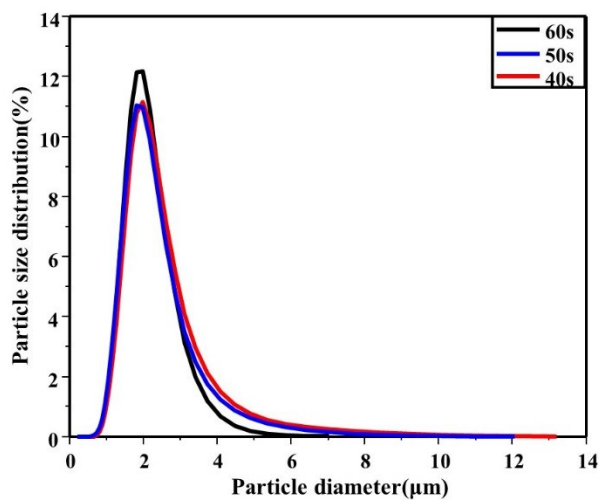

**Figure 2.** The particle size distributions of the metatitanic acid by different microwave heating time, and the hydrolization time was 3.5h.

**STable 2.** The particle size of different STS concentration seeds

| <b>STS concentration<br/>(g/L)</b> | 30  | 35  | 40  | 45  | 50  |
|------------------------------------|-----|-----|-----|-----|-----|
| <b>Particle size<br/>(nm)</b>      | 2.1 | 2.1 | 3.0 | 3.2 | 3.5 |
